# Supplementary material
Source: publisher figshare collection journal article supplement (https://asha.figshare.com/articles/dataset/_/6170501)
Supplement: Supplementary file 1 [file 1]

**Supplemental Table 10.** Correlations (and Uncorrected *p* Values) Among Measures Used for Inhibition-Concentration Composite Score\*

|                             | Number-Letter<br>Sequencing | SCWT Color Word<br>Raw | TOVA<br>Commissions | TOVA<br>Omissions | TOVA<br>Response<br>Time |
|-----------------------------|-----------------------------|------------------------|---------------------|-------------------|--------------------------|
| Number-Letter<br>Sequencing | ---                         | -.699 (<.001)          | .379 (.01)          | .310 (.02)        | .636 (<.001)             |
| SCWT Color<br>Word Raw      | -.488 (<.001)               | ---                    | -.385 (.004)        | -.337 (.01)       | -.671 (<.001)            |
| TOVA<br>Commissions         | .359 (.01)                  | -.346 (.01)            | ---                 | .617 (<.001)      | .404 (.003)              |
| TOVA<br>Omissions           | .529 (<.001)                | -.565 (<.001)          | .344 (.01)          | ---               | .504 (<.001)             |
| TOVA<br>Response<br>Time    | .443 (.001)                 | -.532 (<.001)          | .494 (<.001)        | .746 (<.001)      | ---                      |

\*CI sample is below the diagonal; NH sample above the diagonal. *N*s range from 53 to 55 due to missing data.
