# Supplementary material
Source: publisher figshare collection journal article supplement (https://asha.figshare.com/articles/dataset/_/6170501)
Supplement: Supplementary file 2 [file 1]

**Supplemental Table 3.** Principal Components Analysis Table for Verbal Working Memory Composite Score

|                     | Loadings<br>Factor 1 | Communality |
|---------------------|----------------------|-------------|
| Forward Digit Span  | .838                 | .703        |
| Backward Digit Span | .759                 | .576        |
| Visual Digit Span   | .860                 | .740        |
| Eigenvalue          | 2.019                |             |
| % of Total Variance | 67.3                 |             |
