# Supplementary material
Source: publisher figshare collection journal article supplement (https://asha.figshare.com/articles/dataset/_/6170501)
Supplement: Supplementary file 3 [file 1]

**Supplemental Table 1.** Principal Components Analysis Table for Speech Composite Score\*

|                     | Loadings<br>Factor 1 | Communality |
|---------------------|----------------------|-------------|
| HINT Quiet          | .929                 | .864        |
| AVLNSTA             | .928                 | .861        |
| LNT                 | .866                 | .749        |
| HINT Noise          | .864                 | .746        |
| AVLNSTAV            | .726                 | .527        |
| Eigenvalue          | 3.747                |             |
| % of Total Variance | 74.948               |             |

\*Includes data only from cochlear implant group
