# Supplementary material
Source: publisher figshare collection journal article supplement (https://asha.figshare.com/articles/dataset/_/6170501)
Supplement: Supplementary file 4 [file 1]

**Supplemental Table 8.** Correlations (and Uncorrected *p* Values) Among Measures Used for Verbal Working Memory Perception Composite Score\*

|                        | Forward<br>Digit Span | Backward<br>Digit Span | Visual<br>Digit Span |
|------------------------|-----------------------|------------------------|----------------------|
| Forward<br>Digit Span  | ---                   | .494 (<.001)           | .552 (<.001)         |
| Backward<br>Digit Span | .267 (.05)            | ---                    | .314 (.02)           |
| Visual<br>Digit Span   | .351 (.01)            | .602 (<.001)           | ---                  |

\*CI sample ( $N = 55$ ) is below the diagonal; NH ( $N = 55$ ) sample above the diagonal.
