# Supplementary material
Source: publisher figshare collection journal article supplement (https://asha.figshare.com/articles/dataset/_/6170501)
Supplement: Supplementary file 5 [file 1]

**Supplemental Table 9.** Correlations (and Uncorrected *p* Values) Among Measures Used for Fluency-Speed Composite Score\*

|                                | WISC-4<br>Coding | WICS-4<br>Coding Copy | WJ-III Pair<br>Cancellation | WJ-III<br>Retrieval<br>Fluency | WJ-III Visual<br>Matching |
|--------------------------------|------------------|-----------------------|-----------------------------|--------------------------------|---------------------------|
| WISC-4<br>Coding               | ---              | .842 (<.001)          | .577 (<.001)                | .651 (<.001)                   | .807 (<.001)              |
| WICS-4<br>Coding Copy          | .834 (<.001)     | ---                   | .616 (<.001)                | .656 (<.001)                   | .779 (<.001)              |
| WJ-III Pair<br>Cancellation    | .579 (<.001)     | .522 (<.001)          | ---                         | .517 (<.001)                   | .679 (<.001)              |
| WJ-III<br>Retrieval<br>Fluency | .666 (<.001)     | .715 (<.001)          | .514 (<.001)                | ---                            | .678 (<.001)              |
| WJ-III Visual<br>Matching      | .812 (<.001)     | .764 (<.001)          | .567 (<.001)                | .628 (<.001)                   | ---                       |

\*CI sample ( $N = 55$ ) is below the diagonal; NH ( $N = 55$ ) sample above the diagonal.
