# Supplementary material
Source: publisher figshare collection journal article supplement (https://asha.figshare.com/articles/dataset/_/6170501)
Supplement: Supplementary file 6 [file 1]

**Supplemental Table 5.** Principal Components Analysis Table for Inhibition-Concentration Composite Score

|                          | Loadings<br>Factor 1 | Communality |
|--------------------------|----------------------|-------------|
| Number-Letter Sequencing | .790                 | .624        |
| SCWT Color Word Raw      | -.760                | .578        |
| TOVA Commissions         | .678                 | .459        |
| TOVA Omissions           | .804                 | .647        |
| TOVA Response Time       | .861                 | .741        |
| Eigenvalue               | 3.049                |             |
| % of Total Variance      | 60.987               |             |
