# Supplementary material
Source: publisher figshare collection journal article supplement (https://asha.figshare.com/articles/dataset/_/6170501)
Supplement: Supplementary file 7 [file 1]

**Supplemental Table 11.** Partial Correlations (and Uncorrected *p* Values) of Verbal Rehearsal Speed and Perceptual Encoding Speed with Speech, Language, and Executive Function Composites in CI and NH Groups After Controlling for Age

|                                    | Verbal Rehearsal Speed<br>McGarr Utterance Duration |            | Perceptual Encoding Speed<br>Composite |             |
|------------------------------------|-----------------------------------------------------|------------|----------------------------------------|-------------|
|                                    | CI                                                  | NH         | CI                                     | NH          |
| Speech Perception Composite        | -.57 (<.01)                                         | ---        | .28 (.06)                              | ---         |
| Language Composite                 | -.51 (<.01)                                         | -.11 (.43) | .28 (.05)                              | .18 (.18)   |
| Verbal WM Composite                | -.27 (.05)                                          | -.25 (.07) | .53 (<.01)                             | .44 (<.01)  |
| Fluency-Speed Composite            | -.20 (.15)                                          | -.23 (.10) | .58 (<.01)                             | .66 (<.01)  |
| Inhibition-Concentration Composite | .02 (.88)                                           | .20 (.16)  | -.54 (<.00)                            | -.71 (<.01) |
