# Supplementary material
Source: publisher figshare collection journal article supplement (https://asha.figshare.com/articles/dataset/_/6170501)
Supplement: Supplementary file 8 [file 1]

**Supplemental Table 7.** Correlations (and Uncorrected  $p$  Values) Among Measures Used for Language Composite Score in CI Users\*

|           | PPVT         | CELF Core    |
|-----------|--------------|--------------|
| PPVT      | ---          | .569 (<.001) |
| CELF Core | .907 (<.001) | ---          |

\*CI sample ( $N = 53$ ) is below the diagonal; NH sample ( $N = 55$ ) above the diagonal.
