# Supplementary material
Source: publisher figshare collection journal article supplement (https://asha.figshare.com/articles/dataset/_/6170501)
Supplement: Supplementary file 9 [file 1]

**Supplemental Table 4.** Principal Components Analysis Table for Fluency-Speed Composite Score

|                          | Loadings<br>Factor 1 | Communality |
|--------------------------|----------------------|-------------|
| WISC-4 Coding            | .913                 | .834        |
| WICS-4 Coding Copy       | .906                 | .821        |
| WJ-III Pair Cancellation | .732                 | .536        |
| WJ-III Retrieval Fluency | .819                 | .671        |
| WJ-III Visual Matching   | .904                 | .817        |
| Eigenvalue               | 3.679                |             |
| % of Total Variance      | 73.585               |             |
