# Supplementary material
Source: publisher figshare collection journal article supplement (https://asha.figshare.com/articles/dataset/_/6170501)
Supplement: Supplementary file 10 [file 1]

**Supplemental Table 6.** Correlations (and Uncorrected *p* Values) Among Measures Used for Speech Perception Composite Score in CI Users\*

|            | HINT Quiet   | AVLNSTA      | LNT          | HINT Noise  | AVLNSTA |
|------------|--------------|--------------|--------------|-------------|---------|
| HINT Quiet | ---          |              |              |             |         |
| AVLNSTA    | .923 (<.001) | ---          |              |             |         |
| LNT        | .863 (<.001) | .873 (<.001) | ---          |             |         |
| HINT Noise | .752 (<.001) | .729 (<.001) | .863 (<.001) | ---         |         |
| AVLNSTAV   | .738 (<.001) | .742 (<.001) | .612 (<.001) | .428 (.002) | ---     |

\*Includes data only from cochlear implant group. Ns range from 50 to 54 due to missing data.
