# Supplementary material
Source: publisher figshare collection journal article supplement (https://asha.figshare.com/articles/dataset/_/6170501)
Supplement: Supplementary file 11 [file 1]

**Supplemental Table 2.** Principal Components Analysis Table for Language Composite Score

|                     | Loadings<br>Factor 1 | Communality |
|---------------------|----------------------|-------------|
| PPVT                | .961                 | .924        |
| CELF Core           | .961                 | .924        |
| Eigenvalue          | 1.847                |             |
| % of Total Variance | 92.37                |             |
